# Supplementary material for: Romantic Attraction and Substance Use in 15-Year-Old Adolescents from Eight European Countries
Source: MDPI journal article supplement (doi:10.3390/ijerph16173063), 2019-08-23
Supplement: s1 [file s1]

**Table S1 (supplement).** Crude and adjusted odds for cigarette smoking in the last 30 days, overall and by gender ( $n = 13,504$ )

|                     | Univariate models |          |             | Multivariate model (overall) |          |             | Multivariate model stratified for sex |          |             |                      |          |             |
|---------------------|-------------------|----------|-------------|------------------------------|----------|-------------|---------------------------------------|----------|-------------|----------------------|----------|-------------|
|                     | COR <sup>1</sup>  | <i>p</i> | (95% CI)    | AOR <sup>2</sup>             | <i>p</i> | (95% CI)    | Boys ( $n = 6693$ )                   |          |             | Girls ( $n = 6811$ ) |          |             |
|                     |                   |          |             |                              |          |             | AOR                                   | <i>p</i> | (95% CI)    | AOR                  | <i>p</i> | (95% CI)    |
| <b>Love</b>         |                   |          |             |                              |          |             |                                       |          |             |                      |          |             |
| Opposite-sex love   | 1                 |          |             | 1                            |          |             | 1                                     |          |             | 1                    |          |             |
| Same-sex love       | <b>2.00</b>       | < .001   | (1.48–2.69) | <b>1.85</b>                  | < .001   | (1.34–2.55) | <b>2.36</b>                           | < .001   | (1.46–3.82) | <b>1.57</b>          | < .001   | (1.02–2.41) |
| Both-sex love       | <b>2.28</b>       | < .001   | (1.74–2.99) | <b>2.31</b>                  | < .001   | (1.71–3.13) | <b>2.80</b>                           | < .001   | (1.65–4.75) | <b>2.10</b>          | < .001   | (1.44–3.04) |
| Not in love         | <b>0.47</b>       | < .001   | (0.40–0.56) | <b>0.44</b>                  | < .001   | (0.37–0.52) | <b>0.53</b>                           | < .001   | (0.41–0.70) | <b>0.38</b>          | < .001   | (0.30–0.48) |
| Not responding      | 1.08              | .599     | (0.81–1.43) | 0.89                         | .450     | (0.67–1.20) | 1.12                                  | .584     | (0.75–1.65) | 0.68                 | .093     | (0.44–1.07) |
| <b>Country</b>      |                   |          |             |                              |          |             |                                       |          |             |                      |          |             |
| Belgium (French)    | 1                 |          |             | 1                            |          |             | 1                                     |          |             | 1                    |          |             |
| Bulgaria            | <b>1.64</b>       | < .001   | (1.40–1.93) | <b>1.58</b>                  | < .001   | (1.35–1.87) | <b>1.31</b>                           | .024     | (1.04–1.66) | <b>1.89</b>          | < .001   | (1.51–2.37) |
| Switzerland         | 0.86              | .069     | (0.72–1.01) | 0.85                         | .068     | (0.72–1.01) | 0.96                                  | .766     | (0.75–1.24) | <b>0.76</b>          | .024     | (0.60–0.96) |
| England             | <b>0.55</b>       | < .001   | (0.46–0.67) | <b>0.67</b>                  | < .001   | (0.55–0.82) | <b>0.50</b>                           | < .001   | (0.36–0.68) | 0.85                 | .240     | (0.66–1.11) |
| France              | <b>1.46</b>       | < .001   | (1.15–1.60) | <b>1.38</b>                  | < .001   | (1.17–1.63) | <b>1.34</b>                           | .022     | (1.04–1.71) | <b>1.42</b>          | .003     | (1.13–1.78) |
| Hungary             | <b>1.65</b>       | < .001   | (1.38–1.96) | <b>1.69</b>                  | < .001   | (1.42–2.02) | <b>1.57</b>                           | .001     | (1.21–2.04) | <b>1.79</b>          | < .001   | (1.41–2.28) |
| Iceland             | <b>0.21</b>       | < .001   | (0.17–0.25) | <b>0.19</b>                  | < .001   | (0.16–0.23) | <b>0.18</b>                           | < .001   | (0.14–0.25) | <b>0.20</b>          | < .001   | (0.15–0.26) |
| North Macedonia     | <b>0.71</b>       | < .001   | (0.59–0.86) | <b>0.73</b>                  | < .001   | (0.61–0.88) | <b>0.75</b>                           | .037     | (0.57–0.99) | <b>0.71</b>          | .01      | (0.55–0.92) |
| <b>Relative FAS</b> |                   |          |             |                              |          |             |                                       |          |             |                      |          |             |
| Lowest 20 percent   | 1                 |          |             | 1                            |          |             | 1                                     |          |             | 1                    |          |             |
| Medium 60 percent   | 1.08              | .194     | (0.96–1.21) | 0.98                         | .786     | (0.87–1.11) | 1.07                                  | .435     | (0.90–1.28) | 0.92                 | .323     | (0.76–1.09) |
| Highest 20 percent  | <b>1.32</b>       | < .001   | (1.15–1.52) | <b>1.27</b>                  | .001     | (1.10–1.47) | <b>1.28</b>                           | .026     | (1.03–1.59) | <b>1.26</b>          | .022     | (1.03–1.54) |
| <b>Sex</b>          |                   |          |             |                              |          |             |                                       |          |             |                      |          |             |
| Boy                 | 1                 |          |             | 1                            |          |             |                                       |          |             |                      |          |             |
| Girl                | <b>1.21</b>       | < .001   | (1.11–1.33) | <b>1.26</b>                  | < .001   | (1.15–1.38) |                                       |          |             |                      |          |             |

<sup>1</sup>COR: Crude odds ratios. <sup>2</sup>AOR: Odds ratios adjusted for region, gender, and relative family affluence. Boldface indicates statistically significant differences in ( $p < .05$ ) odds for cigarette smoking in the given group, as compared to the reference group.

**Table S2 (supplement).** Crude and adjusted odds for alcohol consumption in the last 30 days, overall and by gender ( $n = 13,440$ )

|                     | Univariate models |          |             | Multivariate model (overall) |          |             | Multivariate model stratified for sex |          |             |                      |          |             |
|---------------------|-------------------|----------|-------------|------------------------------|----------|-------------|---------------------------------------|----------|-------------|----------------------|----------|-------------|
|                     | COR <sup>1</sup>  | <i>p</i> | (95% CI)    | AOR <sup>2</sup>             | <i>p</i> | (95% CI)    | Boys ( $n = 6656$ )                   |          |             | Girls ( $n = 6784$ ) |          |             |
|                     |                   |          |             |                              |          |             | AOR                                   | <i>p</i> | (95% CI)    | AOR                  | <i>p</i> | (95% CI)    |
| <b>Love</b>         |                   |          |             |                              |          |             |                                       |          |             |                      |          |             |
| Opposite-sex love   | 1                 |          |             | 1                            |          |             | 1                                     |          |             | 1                    |          |             |
| Same-sex love       | 1.27              | .093     | (0.96–1.66) | 1.20                         | .230     | (0.89–1.63) | <b>1.66</b>                           | .036     | (1.03–2.66) | 0.97                 | .880     | (0.64–1.46) |
| Both-sex love       | <b>1.67</b>       | < .001   | (1.29–2.15) | <b>1.80</b>                  | < .001   | (1.33–2.43) | 1.08                                  | .784     | (0.64–1.81) | <b>2.15</b>          | < .001   | (1.50–3.08) |
| Not in love         | <b>0.67</b>       | < .001   | (0.60–0.75) | <b>0.52</b>                  | < .001   | (0.46–0.59) | <b>0.56</b>                           | < .001   | (0.47–0.67) | <b>0.49</b>          | < .001   | (0.42–0.58) |
| Not responding      | <b>0.66</b>       | .001     | (0.52–0.84) | <b>0.48</b>                  | < .001   | (0.38–0.62) | <b>0.57</b>                           | .001     | (0.41–0.79) | <b>0.37</b>          | < .001   | (0.26–0.56) |
| <b>Country</b>      |                   |          |             |                              |          |             |                                       |          |             |                      |          |             |
| Belgium (French)    | 1                 |          |             | 1                            |          |             | 1                                     |          |             | 1                    |          |             |
| Bulgaria            | <b>1.38</b>       | < .001   | (1.20–1.58) | <b>1.32</b>                  | < .001   | (1.14–1.51) | <b>1.36</b>                           | .002     | (1.12–1.66) | <b>1.26</b>          | .023     | (1.03–1.54) |
| Switzerland         | <b>0.78</b>       | < .001   | (0.68–0.89) | <b>0.76</b>                  | < .001   | (0.66–0.87) | 0.84                                  | .073     | (0.69–1.02) | <b>0.69</b>          | < .001   | (0.57–0.83) |
| England             | <b>0.81</b>       | .004     | (0.71–0.93) | 0.98                         | .735     | (0.84–1.13) | <b>0.78</b>                           | .022     | (0.64–0.97) | 1.22                 | .057     | (0.99–1.50) |
| France              | <b>0.75</b>       | < .001   | (0.65–0.86) | <b>0.74</b>                  | < .001   | (0.64–0.85) | <b>0.81</b>                           | .041     | (0.66–0.99) | <b>0.67</b>          | < .001   | (0.54–0.81) |
| Hungary             | <b>1.32</b>       | < .001   | (1.14–1.54) | <b>1.38</b>                  | < .001   | (1.18–1.61) | <b>1.45</b>                           | .001     | (1.16–1.82) | <b>1.30</b>          | .015     | (1.05–1.61) |
| Iceland             | <b>0.14</b>       | < .001   | (0.12–0.16) | <b>0.13</b>                  | < .001   | (0.11–0.15) | <b>0.11</b>                           | < .001   | (0.09–0.14) | <b>0.14</b>          | < .001   | (0.11–0.17) |
| North Macedonia     | <b>0.45</b>       | < .001   | (0.39–0.52) | <b>0.46</b>                  | < .001   | (0.40–0.54) | <b>0.51</b>                           | < .001   | (0.41–0.63) | <b>0.41</b>          | < .001   | (0.33–0.51) |
| <b>Relative FAS</b> |                   |          |             |                              |          |             |                                       |          |             |                      |          |             |
| Lowest 20 percent   | 1                 |          |             | 1                            |          |             | 1                                     |          |             | 1                    |          |             |
| Medium 60 percent   | <b>1.49</b>       | < .001   | (1.35–1.63) | <b>1.34</b>                  | < .001   | (1.22–1.49) | <b>1.34</b>                           | < .001   | (1.17–1.54) | <b>1.37</b>          | < .001   | (1.19–1.59) |
| Highest 20 percent  | <b>1.75</b>       | < .001   | (1.56–1.96) | <b>1.81</b>                  | < .001   | (1.60–2.04) | <b>1.75</b>                           | < .001   | (1.47–2.08) | <b>1.91</b>          | < .001   | (1.61–2.28) |
| <b>Sex</b>          |                   |          |             |                              |          |             |                                       |          |             |                      |          |             |
| Boy                 | 1                 |          |             | 1                            |          |             |                                       |          |             |                      |          |             |
| Girl                | <b>0.91</b>       | .007     | (0.85–0.98) | <b>0.91</b>                  | .012     | (0.84–0.98) |                                       |          |             |                      |          |             |

<sup>1</sup>COR: Crude odds ratios. <sup>2</sup>AOR: Odds ratios adjusted for region, gender, and relative family affluence. Boldface indicates statistically significant differences in ( $p < .05$ ) odds for alcohol consumption in the given group, as compared to the reference group.

**Table S3 (supplement).** Crude and adjusted odds for drunkenness in the last 30 days, overall and by gender ( $n = 13,471$ )

|                     | Univariate models |          |             | Multivariate model (overall) |          |             | Multivariate model stratified for sex |          |             |                      |          |             |
|---------------------|-------------------|----------|-------------|------------------------------|----------|-------------|---------------------------------------|----------|-------------|----------------------|----------|-------------|
|                     | COR <sup>1</sup>  | <i>p</i> | (95% CI)    | AOR <sup>2</sup>             | <i>p</i> | (95% CI)    | Boys ( $n = 6693$ )                   |          |             | Girls ( $n = 6811$ ) |          |             |
|                     |                   |          |             |                              |          |             | AOR                                   | <i>p</i> | (95% CI)    | AOR                  | <i>p</i> | (95% CI)    |
| <b>Love</b>         |                   |          |             |                              |          |             |                                       |          |             |                      |          |             |
| Opposite-sex love   | 1                 |          |             | 1                            |          |             | 1                                     |          |             | 1                    |          |             |
| Same-sex love       | <b>1.92</b>       | < .001   | (1.39–2.67) | <b>1.81</b>                  | .001     | (1.28–2.55) | <b>2.42</b>                           | < .001   | (1.48–3.96) | 1.38                 | .204     | (0.84–2.28) |
| Both-sex love       | <b>2.20</b>       | < .001   | (1.63–2.96) | <b>2.19</b>                  | < .001   | (1.59–3.02) | <b>1.93</b>                           | .016     | (1.13–3.31) | <b>2.25</b>          | < .001   | (1.51–3.34) |
| Not in love         | <b>0.65</b>       | < .001   | (0.55–0.77) | <b>0.51</b>                  | < .001   | (0.43–0.61) | <b>0.55</b>                           | < .001   | (0.42–0.72) | <b>0.47</b>          | < .001   | (0.37–0.60) |
| Not responding      | 0.98              | .879     | (0.70–1.36) | <b>0.68</b>                  | .021     | (0.48–0.94) | 0.71                                  | .120     | (0.46–1.09) | 0.63                 | .090     | (0.37–1.07) |
| <b>Country</b>      |                   |          |             |                              |          |             |                                       |          |             |                      |          |             |
| Belgium (French)    | 1                 |          |             | 1                            |          |             | 1                                     |          |             | 1                    |          |             |
| Bulgaria            | <b>1.85</b>       | < .001   | (1.55–2.21) | <b>1.75</b>                  | < .001   | (1.47–2.09) | <b>2.01</b>                           | < .001   | (1.58–2.56) | <b>1.44</b>          | .008     | (1.10–1.87) |
| Switzerland         | <b>0.72</b>       | .001     | (0.59–0.88) | <b>0.71</b>                  | .001     | (0.58–0.87) | 0.76                                  | .058     | (0.58–1.01) | <b>0.66</b>          | .005     | (0.49–0.88) |
| England             | <b>1.27</b>       | .014     | (1.05–1.53) | <b>1.51</b>                  | < .001   | (1.24–1.84) | 1.06                                  | .694     | (0.79–1.42) | <b>2.10</b>          | < .001   | (1.61–2.75) |
| France              | <b>0.68</b>       | < .001   | (0.55–0.84) | <b>0.67</b>                  | < .001   | (0.54–0.83) | <b>0.62</b>                           | .002     | (0.46–0.84) | <b>0.74</b>          | .042     | (0.55–0.99) |
| Hungary             | <b>2.05</b>       | < .001   | (1.70–2.48) | <b>2.11</b>                  | < .001   | (1.75–2.56) | <b>2.09</b>                           | < .001   | (1.59–2.75) | <b>2.13</b>          | < .001   | (1.63–2.79) |
| Iceland             | <b>0.22</b>       | < .001   | (0.18–0.28) | <b>0.21</b>                  | < .001   | (0.17–0.27) | <b>0.19</b>                           | < .001   | (0.14–0.26) | <b>0.23</b>          | < .001   | (0.17–0.32) |
| North Macedonia     | <b>0.65</b>       | < .001   | (0.52–0.81) | <b>0.66</b>                  | < .001   | (0.53–0.83) | 0.76                                  | .065     | (0.56–1.02) | <b>0.56</b>          | .001     | (0.40–0.76) |
| <b>Relative FAS</b> |                   |          |             |                              |          |             |                                       |          |             |                      |          |             |
| Lowest 20 percent   | 1                 |          |             | 1                            |          |             | 1                                     |          |             | 1                    |          |             |
| Medium 60 percent   | <b>1.29</b>       | < .001   | (1.13–1.48) | <b>1.18</b>                  | .020     | (1.03–1.36) | 1.18                                  | .082     | (0.98–1.44) | 1.18                 | .112     | (0.96–1.45) |
| Highest 20 percent  | <b>1.65</b>       | < .001   | (1.40–1.93) | <b>1.64</b>                  | < .001   | (1.39–1.94) | <b>1.68</b>                           | < .001   | (1.34–2.12) | <b>1.63</b>          | < .001   | (1.28–2.07) |
| <b>Sex</b>          |                   |          |             |                              |          |             |                                       |          |             |                      |          |             |
| Boy                 | 1                 |          |             | 1                            |          |             |                                       |          |             |                      |          |             |
| Girl                | <b>0.88</b>       | .014     | (0.79–0.98) | <b>0.89</b>                  | .021     | (0.80–0.98) |                                       |          |             |                      |          |             |

<sup>1</sup>COR: Crude odds ratios. <sup>2</sup>AOR: Odds ratios adjusted for region, gender, and relative family affluence. Boldface indicates statistically significant differences in ( $p < .05$ ) odds for drunkenness in the given group, as compared to the reference group.

**Table S4 (supplement).** Crude and adjusted odds for cannabis use in the last 30 days, overall and by gender ( $n = 12,109$ )

|                     | Univariate models |          |             | Multivariate model (overall) |          |             | Multivariate model stratified for sex |          |             |                      |          |             |
|---------------------|-------------------|----------|-------------|------------------------------|----------|-------------|---------------------------------------|----------|-------------|----------------------|----------|-------------|
|                     | COR <sup>1</sup>  | <i>p</i> | (95% CI)    | AOR <sup>2</sup>             | <i>p</i> | (95% CI)    | Boys ( $n = 5999$ )                   |          |             | Girls ( $n = 6110$ ) |          |             |
|                     |                   |          |             |                              |          |             | AOR                                   | <i>p</i> | (95% CI)    | AOR                  | <i>p</i> | (95% CI)    |
| <b>Love</b>         |                   |          |             |                              |          |             |                                       |          |             |                      |          |             |
| Opposite-sex love   | 1                 |          |             | 1                            |          |             | 1                                     |          |             | 1                    |          |             |
| Same-sex love       | <b>2.21</b>       | < .001   | (1.48–3.31) | <b>2.16</b>                  | .001     | (1.39–3.36) | <b>2.90</b>                           | .001     | (1.57–5.38) | 1.62                 | .142     | (0.85–3.09) |
| Both-sex love       | <b>3.19</b>       | < .001   | (2.30–4.44) | <b>3.57</b>                  | < .001   | (2.48–5.13) | <b>4.12</b>                           | < .001   | (2.33–7.30) | <b>3.20</b>          | < .001   | (1.99–5.15) |
| Not in love         | <b>0.68</b>       | .001     | (0.54–0.85) | <b>0.62</b>                  | < .001   | (0.48–0.79) | <b>0.71</b>                           | .048     | (0.51–1.00) | <b>0.53</b>          | .001     | (0.36–0.77) |
| Not responding      | 1.18              | .581     | (0.66–2.10) | 1.05                         | .979     | (0.57–1.93) | 1.10                                  | .821     | (0.50–2.40) | 1.01                 | .990     | (0.38–2.65) |
| <b>Country</b>      |                   |          |             |                              |          |             |                                       |          |             |                      |          |             |
| Belgium (French)    | 1                 |          |             | 1                            |          |             | 1                                     |          |             | 1                    |          |             |
| Bulgaria            | 1.02              | .920     | (0.75–1.39) | 0.96                         | .814     | (0.70–1.32) | 0.95                                  | .805     | (0.61–1.48) | 0.97                 | .895     | (0.61–1.53) |
| Switzerland         | 1.23              | .181     | (0.91–1.67) | 1.28                         | .115     | (0.94–1.75) | 1.43                                  | .106     | (0.93–2.21) | 1.11                 | .645     | (0.71–1.73) |
| England             | 0.78              | .131     | (0.56–1.08) | 0.89                         | .513     | (0.64–1.25) | 0.80                                  | .370     | (0.50–1.30) | 1.01                 | .954     | (0.63–1.63) |
| France              | <b>1.47</b>       | .014     | (1.08–1.99) | <b>1.50</b>                  | .010     | (1.10–2.05) | 1.50                                  | .072     | (0.96–2.33) | 1.51                 | .064     | (0.98–2.33) |
| Hungary             | <b>0.43</b>       | < .001   | (0.29–0.64) | <b>0.44</b>                  | < .001   | (0.30–0.65) | <b>0.43</b>                           | .003     | (0.25–0.75) | <b>0.45</b>          | .005     | (0.26–0.79) |
| Iceland             | <b>0.20</b>       | < .001   | (0.14–0.29) | <b>0.19</b>                  | < .001   | (0.13–0.28) | <b>0.19</b>                           | < .001   | (0.11–0.31) | <b>0.20</b>          | < .001   | (0.12–0.33) |
| North Macedonia     | <b>0.17</b>       | < .001   | (0.11–0.28) | <b>0.17</b>                  | < .001   | (0.11–0.28) | <b>0.20</b>                           | < .001   | (0.11–0.38) | <b>0.14</b>          | < .001   | (0.06–0.30) |
| <b>Relative FAS</b> |                   |          |             |                              |          |             |                                       |          |             |                      |          |             |
| Lowest 20 percent   | 1                 |          |             | 1                            |          |             | 1                                     |          |             | 1                    |          |             |
| Medium 60 percent   | 1.06              | .529     | (0.88–1.27) | 0.96                         | .694     | (0.80–1.16) | 1.00                                  | .977     | (0.78–1.27) | 0.94                 | .690     | (0.70–1.26) |
| Highest 20 percent  | <b>1.51</b>       | < .001   | (1.22–1.85) | <b>1.57</b>                  | < .001   | (1.27–1.95) | <b>1.50</b>                           | .007     | (1.12–2.00) | <b>1.67</b>          | .002     | (1.21–2.31) |
| <b>Sex</b>          |                   |          |             |                              |          |             |                                       |          |             |                      |          |             |
| Boy                 | 1                 |          |             | 1                            |          |             |                                       |          |             |                      |          |             |
| Girl                | <b>0.75</b>       | < .001   | (0.66–0.86) | <b>0.72</b>                  | < .001   | (0.63–0.84) |                                       |          |             |                      |          |             |

<sup>1</sup>COR: Crude odds ratios. <sup>2</sup>AOR: Odds ratios adjusted for region, gender, and relative family affluence. Boldface indicates statistically significant differences in ( $p < .05$ ) odds for drunkenness in the given group, as compared to the reference group.

**Table S5 (supplement).** Crude and adjusted odds for multiple substance use in the last 30 days, overall and by gender ( $n = 13,580$ )

|                     | Univariate models |          |             | Multivariate model (overall) |          |             | Multivariate model stratified for sex |          |             |                      |          |             |
|---------------------|-------------------|----------|-------------|------------------------------|----------|-------------|---------------------------------------|----------|-------------|----------------------|----------|-------------|
|                     | COR <sup>1</sup>  | <i>p</i> | (95% CI)    | AOR <sup>2</sup>             | <i>p</i> | (95% CI)    | Boys ( $n = 6848$ )                   |          |             | Girls ( $n = 6732$ ) |          |             |
|                     |                   |          |             |                              |          |             | AOR                                   | <i>p</i> | (95% CI)    | AOR                  | <i>p</i> | (95% CI)    |
| <b>Love</b>         |                   |          |             |                              |          |             |                                       |          |             |                      |          |             |
| Opposite-sex love   | 1                 |          |             | 1                            |          |             | 1                                     |          |             | 1                    |          |             |
| Same-sex love       | <b>1.79</b>       | < .001   | (1.30–2.46) | <b>1.68</b>                  | .003     | (1.20–2.35) | <b>2.12</b>                           | .002     | (1.33–3.64) | 1.39                 | .161     | (0.88–2.20) |
| Both-sex love       | <b>2.34</b>       | < .001   | (1.77–3.09) | <b>2.43</b>                  | < .001   | (1.79–3.31) | <b>2.78</b>                           | < .001   | (1.64–4.70) | <b>2.24</b>          | < .001   | (1.54–3.27) |
| Not in love         | <b>0.47</b>       | < .001   | (0.39–0.56) | <b>0.44</b>                  | < .001   | (0.36–0.53) | <b>0.53</b>                           | < .001   | (0.40–0.70) | <b>0.38</b>          | < .001   | (0.29–0.49) |
| Not responding      | 0.84              | .291     | (0.60–1.16) | 0.74                         | .081     | (0.53–1.03) | 0.90                                  | .651     | (0.58–1.41) | <b>0.59</b>          | .044     | (0.35–0.99) |
| <b>Country</b>      |                   |          |             |                              |          |             |                                       |          |             |                      |          |             |
| Belgium (French)    | 1                 |          |             | 1                            |          |             | 1                                     |          |             | 1                    |          |             |
| Bulgaria            | <b>1.57</b>       | < .001   | (1.33–1.86) | <b>1.51</b>                  | < .001   | (1.28–1.79) | <b>1.36</b>                           | .015     | (1.06–1.73) | <b>1.67</b>          | < .001   | (1.32–2.11) |
| Switzerland         | 1.07              | .433     | (0.90–1.27) | 1.07                         | .451     | (0.90–1.27) | 1.28                                  | .052     | (1.00–1.65) | 0.89                 | .341     | (0.69–1.13) |
| England             | <b>0.65</b>       | < .001   | (0.53–0.79) | <b>0.80</b>                  | .029     | (0.65–0.98) | <b>0.60</b>                           | .002     | (0.44–0.83) | 1.00                 | .999     | (0.76–1.31) |
| France              | <b>1.31</b>       | .002     | (1.10–1.56) | <b>1.33</b>                  | .002     | (1.11–1.58) | <b>1.40</b>                           | .011     | (1.08–1.81) | 1.25                 | .068     | (0.98–1.60) |
| Hungary             | <b>1.55</b>       | < .001   | (1.29–1.87) | <b>1.60</b>                  | < .001   | (1.35–1.96) | <b>1.52</b>                           | .003     | (1.16–2.00) | <b>1.66</b>          | < .001   | (1.30–2.14) |
| Iceland             | <b>0.19</b>       | < .001   | (0.16–0.24) | <b>0.18</b>                  | < .001   | (0.15–0.23) | <b>0.17</b>                           | < .001   | (0.12–0.24) | <b>0.19</b>          | < .001   | (0.14–0.25) |
| North Macedonia     | <b>0.45</b>       | < .001   | (0.36–0.56) | <b>0.46</b>                  | < .001   | (0.37–0.58) | <b>0.45</b>                           | < .001   | (0.33–0.63) | <b>0.47</b>          | < .001   | (0.34–0.63) |
| <b>Relative FAS</b> |                   |          |             |                              |          |             |                                       |          |             |                      |          |             |
| Lowest 20 percent   | 1                 |          |             | 1                            |          |             | 1                                     |          |             | 1                    |          |             |
| Medium 60 percent   | <b>1.18</b>       | .010     | (1.04–1.34) | 1.06                         | .355     | (0.93–1.21) | 1.08                                  | .431     | (0.90–1.30) | 1.08                 | .410     | (0.90–1.31) |
| Highest 20 percent  | <b>1.54</b>       | < .001   | (1.32–1.78) | <b>1.50</b>                  | < .001   | (1.29–1.76) | <b>1.44</b>                           | .001     | (1.15–1.81) | <b>1.60</b>          | < .001   | (1.29–1.98) |
| <b>Sex</b>          |                   |          |             |                              |          |             |                                       |          |             |                      |          |             |
| Boy                 | 1                 |          |             | 1                            |          |             |                                       |          |             |                      |          |             |
| Girl                | 1.10              | .051     | (1.00–1.21) | <b>1.12</b>                  | .024     | (1.01–1.23) |                                       |          |             |                      |          |             |

<sup>1</sup>COR: Crude odds ratios. <sup>2</sup>AOR: Odds ratios adjusted for region, gender, and relative family affluence. Boldface indicates statistically significant differences in ( $p < .05$ ) odds for drunkenness in the given group, as compared to the reference group.
